PEARLS

# Plastid–endomembrane connections in apicomplexan parasites

Michael J. Boucher<sup>1,2</sup>, Ellen Yeh<sup>1,2,3,4\*</sup>

**1** Department of Microbiology and Immunology, Stanford University School of Medicine, Stanford, California, United States of America, **2** Department of Biochemistry, Stanford University School of Medicine, Stanford, California, United States of America, **3** Department of Pathology, Stanford University School of Medicine, Stanford, California, United States of America, **4** Chan Zuckerberg Biohub, San Francisco, California, United States of America

\* [ellenyeh@stanford.edu](mailto:ellenyeh@stanford.edu)

The apicoplast is a nonphotosynthetic plastid found in most apicomplexan parasites, including *Plasmodium* spp. (causative agents of malaria) and *Toxoplasma gondii* (causative agent of toxoplasmosis) [1, 2]. It houses essential metabolic pathways and is the target of several antiparasitic drugs [3]. A peculiar feature of the apicoplast is that, unlike endosymbiotic organelles in model organisms, it is integrated into the endomembrane system. Here, we discuss the interplay between the apicoplast and molecular machinery typically associated with the endomembrane system, highlighting outstanding questions and opportunities for drug discovery.

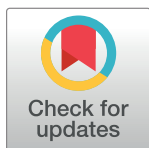

**OPEN ACCESS**

**Citation:** Boucher MJ, Yeh E (2019) Plastid–endomembrane connections in apicomplexan parasites. *PLoS Pathog* 15(6): e1007661. <https://doi.org/10.1371/journal.ppat.1007661>

**Editor:** Laura J. Knoll, University of Wisconsin Medical School, UNITED STATES

**Published:** June 13, 2019

**Copyright:** © 2019 Boucher, Yeh. This is an open access article distributed under the terms of the [Creative Commons Attribution License](https://creativecommons.org/licenses/by/4.0/), which permits unrestricted use, distribution, and reproduction in any medium, provided the original author and source are credited.

**Funding:** Research in the Yeh lab is funded by the National Institutes of Health (K08AI097239 and DP5OD012119), a Burroughs Wellcome Fund Career Award for Medical Scientists, the Chan Zuckerberg Biohub Investigator Program, and a Stanford Bio-X Interdisciplinary Initiatives Seed Grant. MJB was funded by a William R. and Sara Hart Kimball Stanford Graduate Fellowship. The funders had no role in study design, data collection and analysis, decision to publish, or preparation of the manuscript.

**Competing interests:** The authors have declared that no competing interests exist.

## The apicoplast and endomembrane system became uniquely intertwined during secondary endosymbiosis

Apicomplexan parasites evolved from photosynthetic algae that acquired a plastid through successive endosymbiotic events. First, primary endosymbiosis gave rise to chloroplasts (primary plastids) when a eukaryotic cell engulfed a cyanobacterium that over time became a permanent fixture of the photosynthetic cell (Fig 1A). Then, a chloroplast-containing red alga was itself engulfed by another eukaryote to establish a complex secondary plastid during secondary endosymbiosis. One lineage containing a red algal secondary plastid adopted a parasitic lifestyle and gave rise to the Apicomplexa, and the apicomplexan plastid, or apicoplast, was retained in these pathogens despite loss of photosynthesis. Notably, the precise origins of the apicoplast and other red algal secondary plastids are unclear, with significant debate as to whether all such plastids originated from a single endosymbiotic event and have been acquired vertically ever since (the chromalveolate hypothesis) [4] or whether some lineages acquired plastids through more complex processes such as tertiary endosymbiosis [5]. For in-depth discussions of models for plastid evolution, we direct the reader to reviews on the subject [6–10].

One striking result of secondary endosymbiosis is that the apicoplast is bound by four membranes (Fig 1B). Based on the current working model for secondary endosymbiosis (Fig 1A) and the fact that apicoplast protein import involves machinery homologous to the translocons of the outer and inner chloroplast membranes (TOC and TIC complexes) of primary plastids [11–13], the inner two apicoplast membranes are thought to be of cyanobacterial origin. The origins of the two outer membranes, however, are unclear. The most commonly described model proposes that the second plastid membrane from the outside, called the periplastid membrane, is derived from the red algal plasma membrane, and the outermost plastid membrane is derived from endomembrane of the host cell [14]. However, other models, such as an endomembrane origin for both membranes, have been proposed and are equally

plausible [10]. Irrespective of the precise origins of the outer plastid membranes, secondary endosymbiosis inextricably linked red alga-derived plastids to the host endomembrane system. In fact, the secondary plastid of chromists actually resides within the endoplasmic reticulum (ER), with the outermost plastid membrane contiguous with the ER membrane [15, 16]. This contiguity does not exist in the Apicomplexa, in which the ER and apicoplast are discrete organelles [17, 18]. However, the apicoplast and ER membranes have been visualized in close apposition to one another, indicating that there may be physical contact between these compartments [17, 19].

### Apicoplast protein import occurs via the ER

Transfer of endosymbiont genes to the host nucleus is a hallmark of endosymbiosis and necessitates a pathway by which nuclear-encoded proteins are imported back to the organelle. In the Apicomplexa, nuclear-encoded apicoplast proteins traffic via the secretory system [20]. Most apicoplast proteins utilize a bipartite N-terminal targeting sequence consisting of a canonical eukaryotic signal peptide (SP) followed by a chloroplast-derived transit peptide (TP) [20, 21]. The SP mediates import into the ER, after which the TP mediates sorting and trafficking to the apicoplast (Fig 1B). TPs are best studied in *Plasmodium falciparum* and are highly diverse, sharing only the general features of being enriched in basic amino acids and depleted in acidic amino acids, having putative heat shock protein 70 (HSP70) binding sites, and being unstructured in vitro [22, 23].

The mechanism by which degenerate TPs enable specific sorting and trafficking to the apicoplast is poorly understood. Disruption of ER-to-Golgi protein trafficking with the fungal toxin brefeldin A does not ablate import of luminal apicoplast proteins [24, 25], suggesting a model wherein recognition and sorting occur pre-Golgi in the ER. However, other data support a potential role for the Golgi in trafficking luminal apicoplast proteins [26], indicating that there is still much to learn about this sorting process. In particular, identification of candidate machinery that carries out recognition and sorting of apicoplast-bound cargo in the ER will be critical for elucidating this pathway.

After TP recognition, it is additionally unknown how proteins traffic from the endomembrane system to the outermost apicoplast membrane. Although a vesicular trafficking route seems most likely, other models, such as direct transfer of proteins via organelle–organelle contact sites, have not been ruled out. Disruption of SNARE disassembly by expression of a dominant negative  $\alpha$ -SNAP phosphomutant causes apicoplast vesiculation in *T. gondii* [27], consistent with a vesicular model involving SNARE-mediated delivery of cargo. Additionally, in *P. falciparum* parasites induced to lose their apicoplasts, luminal apicoplast proteins localize to diffuse puncta that may represent stalled vesicle-trafficking intermediates [28], although the transport competence of these vesicles has not been shown. Similarly, vesicles containing apicoplast outer-membrane proteins have been observed in *T. gondii* under both apicoplast-intact and -disrupted conditions [29–33]. Because apicoplast outer-membrane proteins tend to lack TPs [34] and luminal apicoplast proteins are absent from these outer-membrane protein-containing vesicles [33], these vesicles suggest two distinct trafficking pathways: one TP-dependent for luminal proteins and one TP-independent for outer-membrane proteins. Overall, current evidence for vesicle-mediated trafficking of apicoplast cargo is circumstantial, and there is therefore significant need for detailed characterization of the trafficking routes and molecular machinery involved in this process.

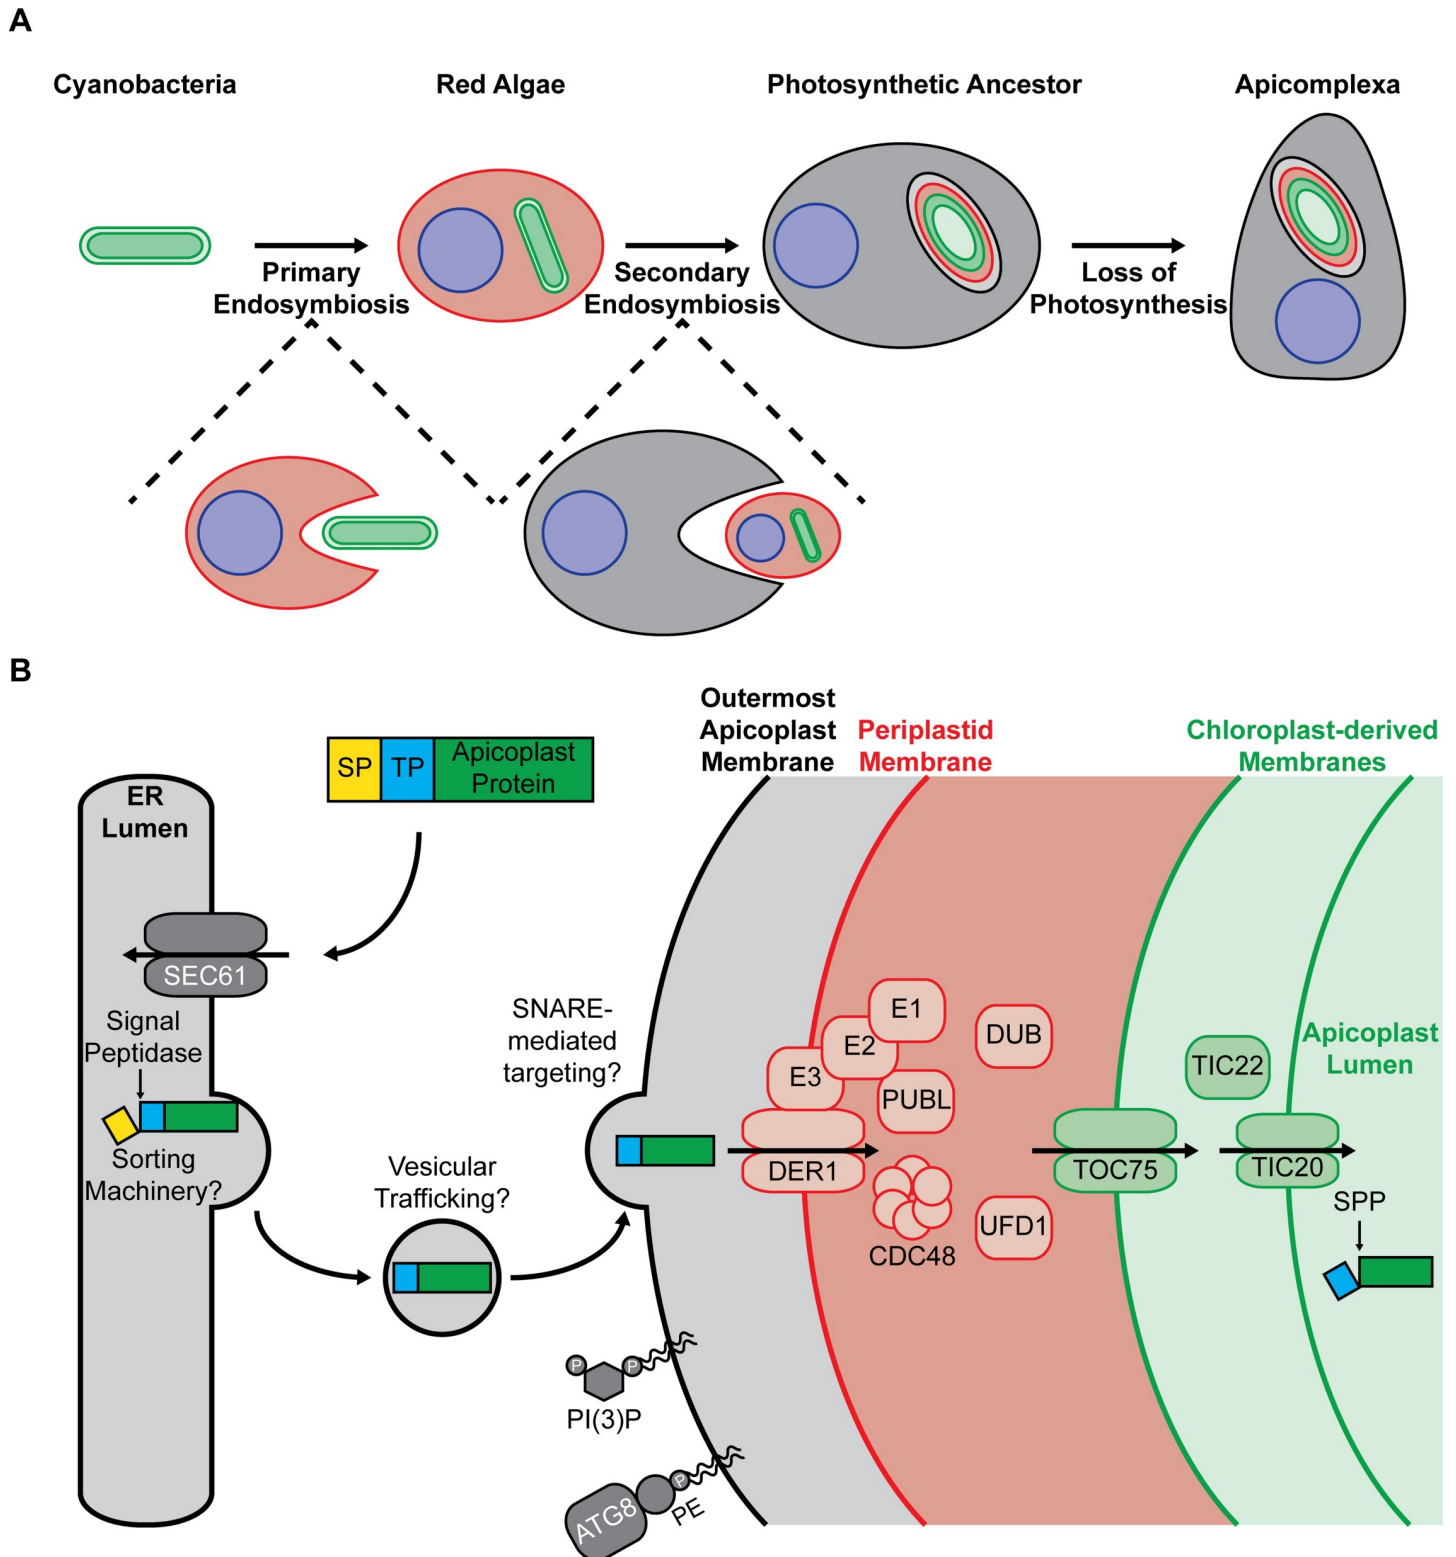

**Fig 1. Models for apicoplast evolutionary history and lumenal protein import.** (A) Model for apicoplast evolutionary history. Red algae arose following primary endosymbiosis, during which a eukaryotic cell engulfed a photosynthetic cyanobacterium that underwent evolutionary reduction to become a chloroplast. The ancestors of the Apicomplexa emerged following secondary endosymbiosis, during which another eukaryotic cell engulfed a red alga, which then underwent evolutionary reduction to become a four-membraned, photosynthetic secondary plastid. During evolution of the Apicomplexa, the secondary plastid lost its photosynthetic machinery but

retained components of key metabolic pathways to become what we now know as the apicoplast. Note that this model is simplified and that the precise evolutionary events that gave rise to the apicoplast (e.g., vertical plastid inheritance from a common chromalveolate ancestor versus acquisition by tertiary endosymbiosis) are not yet resolved. (B) Model for import of luminal apicoplast proteins via the secretory system and retooled ERAD machinery. Most apicoplast proteins contain a bipartite N-terminal targeting signal consisting of a eukaryotic SP followed by a plant-like TP. The SP mediates cotranslational import into the ER via the SEC61 complex and is cleaved by the signal peptidase complex to reveal the TP. The TP then mediates sorting and trafficking to the apicoplast and import across its membranes. The machinery involved in recognizing apicoplast proteins in the endomembrane system is unknown. Apicoplast proteins are presumed to traffic from the ER to the outermost apicoplast membrane via a vesicular trafficking pathway. After crossing the outermost apicoplast membrane, apicoplast proteins cross the periplastid membrane using retooled ERAD machinery. Finally, luminal apicoplast cargo crosses the innermost apicoplast membranes via complexes related to the TOC and TIC machinery of primary plastids. The apicoplast outer membrane contains PI(3)P and ATG8, which are associated with the endomembrane system in model systems. ATG8, autophagy-related 8; CDC48, cell division cycle 48; DER1, degradation in the ER 1; DUB, deubiquitinase; ER, endoplasmic reticulum; ERAD, ER-associated degradation; P, phosphate; PE, phosphatidylethanolamine; PI(3)P, phosphatidylinositol 3-phosphate; PUBL, plastid ubiquitin-like protein; SNARE, soluble N-ethylmaleimide-sensitive factor attachment protein receptor; SP, signal peptide; SPP, stromal processing peptidase; TIC, translocon of the inner chloroplast membrane; TOC, translocon of the outer chloroplast membrane; TP, transit peptide; UFD1, ubiquitin fusion protein degradation 1.

<https://doi.org/10.1371/journal.ppat.1007661.g001>

### Import across the periplastid membrane involves borrowed ER machinery

Once a luminal apicoplast protein is delivered to the outermost apicoplast membrane, the next step is to cross the periplastid membrane. To accomplish this, the Apicomplexa have retooled the ER-associated degradation (ERAD) pathway, which is a conserved eukaryotic pathway typically used for retrotranslocating misfolded proteins from the ER to the cytoplasm for degradation by the ubiquitin–proteasome system. Apicomplexans not only retain canonical, ER-localized ERAD machinery but also encode a nearly complete, divergent set of apicoplast-localized proteins, including DER1-like proteins (potentially constituting the translocon), the AAA ATPase CDC48 (thought to provide the mechanical power for protein translocation), a plastid ubiquitin-like protein (PUBL), and E1/E2/E3 ubiquitin ligases, among others (Fig 1B) [35–41]. DER1 and CDC48 are essential for apicoplast protein import in *T. gondii* [38, 41], confirming the importance of this borrowed ER machinery for apicoplast biology. Interestingly, PUBL and the E2 ubiquitin-conjugating enzyme are also essential for apicoplast protein import in *T. gondii* [40, 41], but whether ubiquitylation of apicoplast cargo actually occurs in cells is unclear. In canonical ERAD, ubiquitylation tags retrotranslocated proteins for degradation, so it is unknown what function ubiquitylation would serve during apicoplast protein import. After crossing the periplastid membrane, apicoplast protein import transitions to utilizing canonical chloroplast pathways, with translocation across the inner two apicoplast membranes involving the TOC and TIC complexes of primary plastids [11–13].

### Autophagy machinery and phosphoinositides may have roles in apicoplast segregation

Another intriguing apicoplast–endomembrane connection is the localization of the autophagy protein ATG8 and phosphoinositides (PIs) to the outer apicoplast membrane (Fig 1B) [32, 42–46]. Here, these important membrane markers may have roles in apicoplast biogenesis, the process whereby new apicoplasts are replicated from an existing apicoplast and are segregated into new daughter cells during parasite replication. In model systems, ATG8 family proteins are localized to autophagosomes, which are specialized organelles that degrade cellular constituents and are thought to derive from multiple endomembranes [47]. Apicoplast-localized ATG8 is essential in both *T. gondii* and *P. falciparum* [48, 49]. Specifically, *T. gondii* ATG8 (*TgATG8*) appears to mediate association of the newly replicated apicoplasts with centrosomes, facilitating their segregation into daughter parasites [48]. Knockdown of *P. falciparum* ATG8 (*PfATG8*) in malaria parasites also supports a function in apicoplast fission and/or segregation [49]. In fact, in blood-stage *P. falciparum*, the only essential role of *PfATG8* is its apicoplast function [49], while it is still debated whether canonical macroautophagy occurs at all in this stage [50]. The precise mechanisms by which ATG8-mediated centrosome association

promotes faithful apicoplast segregation and whether ATG8 has essential nonapicoplast function(s) in *T. gondii* or in *P. falciparum* sexual, mosquito, or liver stages remain unknown.

Phosphatidylinositol is a lipid synthesized in the ER and phosphorylated into various PIs that are critical for membrane signaling and dynamics in eukaryotic cells [51]. Similar to ATG8, PIs in the apicoplast membranes may have a role in apicoplast segregation. Depletion of *T. gondii* phosphoinositide 3-kinase (*TgPI3K*) or phosphoinositide kinase, FYVE-type zinc finger containing (*TgPIKfyve*), which respectively produce phosphatidylinositol 3-phosphate (PI[3]P) and phosphatidylinositol 3,5-bisphosphate (PI[3,5]P<sub>2</sub>), causes apicoplast enlargement followed by apicoplast loss [52]. These data, combined with the apparent absence of a specific protein import defect following *TgPI3K* or *TgPIKfyve* depletion [52], are consistent with a role for PIs in a late step of apicoplast biogenesis.

In fact, it is possible that the apicoplast biogenesis functions of ATG8 and PIs are linked, as the autophagy-related protein ATG18 from both *T. gondii* and *P. falciparum* binds PIs [53, 54]. The human ATG18 homologs WIPI1 and WIPI2 are required for conjugation of the mammalian ATG8 homolog, LC3, to phosphatidylethanolamine (PE) [55]. Consistent with a conserved function, ATG18 depletion in either *T. gondii* or *P. falciparum* reduced ATG8 lipidation and membrane localization, resulting in an apicoplast biogenesis defect [53]. This defect could not be complemented with a mutant deficient in PI binding [53], specifically linking ATG18 PI binding to its apicoplast biogenesis function. Thus, the current data implicate both autophagy machinery and PIs in a critical step of apicoplast biogenesis, whereas further investigation will uncover their exact molecular mechanisms.

### Apicoplast–endomembrane connections may yield novel antiparasitic drug targets

In addition to its fascinating biology, the retooling of endomembrane machinery during secondary endosymbiosis may provide valuable antiparasitic targets. For example, specific small-molecule inhibitors have been developed against the human homologs of CDC48 and the E1 ubiquitin-activating enzyme as anticancer targets [56–60], providing proof of principle of their utility as potential targets. Furthermore, ATG7 is an essential protein that is required for apicoplast biogenesis [61, 62], presumably via its canonical role as an E1 ligase for ATG8 activation, and may be druggable because of its shared chemistry with E1 ubiquitin-activating enzymes. Finally, inhibitors that disrupt the protein–protein interaction between *PfATG8* and its E2 ligase, *PfATG3*, have also been under investigation and may represent a viable antiparasitic strategy [63–65].

In addition to these pathways for which mammalian homologs are established drug targets, we expect that deeper exploration of the interplay between the apicoplast and the endomembrane system will yield additional candidates. For example, the as-yet undiscovered machinery for recognition, sorting, and trafficking of apicoplast cargo may be druggable, as could other currently unidentified biogenesis factors that arose during integration of the apicoplast into the endomembrane system. Therefore, we expect that continued dissection of apicoplast biogenesis mechanisms will elucidate important evolutionary cell biology and will help to sustain a pipeline of novel antiparasitic targets.

### References

1. McFadden GI, Reith ME, Munholland J, Lang-Unnasch N. Plastid in human parasites. *Nature*. 1996; 381(6582):482. <https://doi.org/10.1038/381482a0> PMID: 8632819.
2. Kohler S, Delwiche CF, Denny PW, Tilney LG, Webster P, Wilson RJ, et al. A plastid of probable green algal origin in Apicomplexan parasites. *Science*. 1997; 275(5305):1485–9. PMID: 9045615.



3. Ralph SA, van Dooren GG, Waller RF, Crawford MJ, Fraunholz MJ, Foth BJ, et al. Tropical infectious diseases: metabolic maps and functions of the *Plasmodium falciparum* apicoplast. *Nat Rev Microbiol*. 2004; 2(3):203–16. <https://doi.org/10.1038/nrmicro843> PMID: 15083156.
4. Cavalier-Smith T. Principles of protein and lipid targeting in secondary symbiogenesis: euglenoid, dinoflagellate, and sporozoan plastid origins and the eukaryote family tree. *J Eukaryot Microbiol*. 1999; 46(4):347–66. PMID: 18092388.
5. Sanchez-Puerta MV, Delwiche CF. A hypothesis for plastid evolution in chromalveolates. *J Phycol*. 2008; 44(5):1097–107. <https://doi.org/10.1111/j.1529-8817.2008.00559.x> PMID: 27041706.
6. Gould SB, Waller RF, McFadden GI. Plastid evolution. *Annu Rev Plant Biol*. 2008; 59:491–517. <https://doi.org/10.1146/annurev.arplant.59.032607.092915> PMID: 18315522.
7. Green BR. After the primary endosymbiosis: an update on the chromalveolate hypothesis and the origins of algae with Chl c. *Photosynth Res*. 2011; 107(1):103–15. <https://doi.org/10.1007/s11120-010-9584-2> PMID: 20676772.
8. Keeling PJ. The number, speed, and impact of plastid endosymbioses in eukaryotic evolution. *Annu Rev Plant Biol*. 2013; 64:583–607. <https://doi.org/10.1146/annurev-arplant-050312-120144> PMID: 23451781.
9. Petersen J, Ludewig AK, Michael V, Bunk B, Jarek M, Baurain D, et al. Chromera velia, endosymbioses and the rhodoplex hypothesis—plastid evolution in cryptophytes, alveolates, stramenopiles, and haptophytes (CASH lineages). *Genome Biol Evol*. 2014; 6(3):666–84. <https://doi.org/10.1093/gbe/evu043> PMID: 24572015; PMCID: PMC3971594.
10. Gould SB, Maier UG, Martin WF. Protein import and the origin of red complex plastids. *Curr Biol*. 2015; 25(12):R515–21. <https://doi.org/10.1016/j.cub.2015.04.033> PMID: 26079086.
11. van Dooren GG, Tomova C, Agrawal S, Humbel BM, Striepen B. *Toxoplasma gondii* Tic20 is essential for apicoplast protein import. *Proc Natl Acad Sci U S A*. 2008; 105(36):13574–9. <https://doi.org/10.1073/pnas.0803862105> PMID: 18757752; PMCID: PMC2533231.
12. Glaser S, van Dooren GG, Agrawal S, Brooks CF, McFadden GI, Striepen B, et al. Tic22 is an essential chaperone required for protein import into the apicoplast. *J Biol Chem*. 2012; 287(47):39505–12. <https://doi.org/10.1074/jbc.M112.405100> PMID: 23027875; PMCID: PMC3501059.
13. Sheiner L, Fellows JD, Ovcariakova J, Brooks CF, Agrawal S, Holmes ZC, et al. *Toxoplasma gondii* Toc75 functions in import of stromal but not peripheral apicoplast proteins. *Traffic*. 2015; 16(12):1254–69. <https://doi.org/10.1111/tra.12333> PMID: 26381927.
14. Cavalier-Smith T. Genomic reduction and evolution of novel genetic membranes and protein-targeting machinery in eukaryote-eukaryote chimaeras (meta-algae). *Philos Trans R Soc Lond B Biol Sci*. 2003; 358(1429):109–34. <https://doi.org/10.1098/rstb.2002.1194> PMID: 12594921; PMCID: PMC1693104.
15. Gibbs SP. The route of entry of cytoplasmically synthesized proteins into chloroplasts of algae possessing chloroplast ER. *J Cell Sci*. 1979; 35:253–66. PMID: 422674.
16. Gibbs SP. The chloroplasts of some algal groups may have evolved from endosymbiotic eukaryotic algae. *Ann N Y Acad Sci*. 1981; 361:193–208. PMID: 6941719.
17. Tomova C, Humbel BM, Geerts WJ, Entzeroth R, Holthuis JC, Verkleij AJ. Membrane contact sites between apicoplast and ER in *Toxoplasma gondii* revealed by electron tomography. *Traffic*. 2009; 10(10):1471–80. <https://doi.org/10.1111/j.1600-0854.2009.00954.x> PMID: 19602198.
18. Lemgruber L, Kudryashev M, Dekiwadia C, Riglar DT, Baum J, Stahlberg H, et al. Cryo-electron tomography reveals four-membrane architecture of the *Plasmodium* apicoplast. *Malar J*. 2013; 12:25. <https://doi.org/10.1186/1475-2875-12-25> PMID: 23331966; PMCID: PMC3662607.
19. Hopkins J, Fowler R, Krishna S, Wilson I, Mitchell G, Bannister L. The plastid in *Plasmodium falciparum* asexual blood stages: a three-dimensional ultrastructural analysis. *Protist*. 1999; 150(3):283–95. [https://doi.org/10.1016/S1434-4610\(99\)70030-1](https://doi.org/10.1016/S1434-4610(99)70030-1) PMID: 10575701.
20. Waller RF, Reed MB, Cowman AF, McFadden GI. Protein trafficking to the plastid of *Plasmodium falciparum* is via the secretory pathway. *EMBO J*. 2000; 19(8):1794–802. <https://doi.org/10.1093/emboj/19.8.1794> PMID: 10775264; PMCID: PMC302007.
21. Waller RF, Keeling PJ, Donald RG, Striepen B, Handman E, Lang-Unnasch N, et al. Nuclear-encoded proteins target to the plastid in *Toxoplasma gondii* and *Plasmodium falciparum*. *Proc Natl Acad Sci U S A*. 1998; 95(21):12352–7. <https://doi.org/10.1073/pnas.95.21.12352> PMID: 9770490; PMCID: PMC22835.
22. Foth BJ, Ralph SA, Tonkin CJ, Struck NS, Fraunholz M, Roos DS, et al. Dissecting apicoplast targeting in the malaria parasite *Plasmodium falciparum*. *Science*. 2003; 299(5607):705–8. <https://doi.org/10.1126/science.1078599> PMID: 12560551.
23. Gallagher JR, Matthews KA, Prigge ST. *Plasmodium falciparum* apicoplast transit peptides are unstructured *in vitro* and during apicoplast import. *Traffic*. 2011; 12(9):1124–38. <https://doi.org/10.1111/j.1600-0854.2011.01232.x> PMID: 21668595; PMCID: PMC3629917.

24. DeRocher A, Gilbert B, Feagin JE, Parsons M. Dissection of brefeldin A-sensitive and -insensitive steps in apicoplast protein targeting. *J Cell Sci.* 2005; 118(Pt 3):565–74. <https://doi.org/10.1242/jcs.01627> PMID: 15657083.
25. Tonkin CJ, Struck NS, Mullin KA, Stimmier LM, McFadden GI. Evidence for Golgi-independent transport from the early secretory pathway to the plastid in malaria parasites. *Mol Microbiol.* 2006; 61(3):614–30. <https://doi.org/10.1111/j.1365-2958.2006.05244.x> PMID: 16787449.
26. Heiny SR, Pautz S, Recker M, Przyborski JM. Protein Traffic to the *Plasmodium falciparum* apicoplast: evidence for a sorting branch point at the Golgi. *Traffic.* 2014; 15(12):1290–304. <https://doi.org/10.1111/tra.12226> PMID: 25264207.
27. Stewart RJ, Ferguson DJ, Whitehead L, Bradin CH, Wu HJ, Tonkin CJ. Phosphorylation of alphaSNAP is required for secretory organelle biogenesis in *Toxoplasma gondii*. *Traffic.* 2015. <https://doi.org/10.1111/tra.12348> PMID: 26566590.
28. Yeh E, DeRisi JL. Chemical rescue of malaria parasites lacking an apicoplast defines organelle function in blood-stage *Plasmodium falciparum*. *PLoS Biol.* 2011; 9(8):e1001138. <https://doi.org/10.1371/journal.pbio.1001138> PMID: 21912516; PMCID: PMC3166167.
29. Karnataki A, Derocher A, Coppens I, Nash C, Feagin JE, Parsons M. Cell cycle-regulated vesicular trafficking of *Toxoplasma* APT1, a protein localized to multiple apicoplast membranes. *Mol Microbiol.* 2007; 63(6):1653–68. <https://doi.org/10.1111/j.1365-2958.2007.05619.x> PMID: 17367386.
30. Karnataki A, Derocher AE, Coppens I, Feagin JE, Parsons M. A membrane protease is targeted to the relict plastid of *Toxoplasma* via an internal signal sequence. *Traffic.* 2007; 8(11):1543–53. <https://doi.org/10.1111/j.1600-0854.2007.00637.x> PMID: 17822404.
31. DeRocher AE, Coppens I, Karnataki A, Gilbert LA, Rome ME, Feagin JE, et al. A thioredoxin family protein of the apicoplast periphery identifies abundant candidate transport vesicles in *Toxoplasma gondii*. *Eukaryot Cell.* 2008; 7(9):1518–29. <https://doi.org/10.1128/EC.00081-08> PMID: 18586952; PMCID: PMC2547066.
32. Tawk L, Dubremetz JF, Montcourrier P, Chicanne G, Merezegue F, Richard V, et al. Phosphatidylinositol 3-monophosphate is involved in *Toxoplasma* apicoplast biogenesis. *PLoS Pathog.* 2011; 7(2):e1001286. <https://doi.org/10.1371/journal.ppat.1001286> PMID: 21379336; PMCID: PMC3040667.
33. Bouchut A, Geiger JA, DeRocher AE, Parsons M. Vesicles bearing *Toxoplasma* apicoplast membrane proteins persist following loss of the relict plastid or Golgi body disruption. *PLoS ONE.* 2014; 9(11):e112096. <https://doi.org/10.1371/journal.pone.0112096> PMID: 25369183; PMCID: PMC4219833.
34. Parsons M, Karnataki A, Derocher AE. Evolving insights into protein trafficking to the multiple compartments of the apicomplexan plastid. *J Eukaryot Microbiol.* 2009; 56(3):214–20. <https://doi.org/10.1111/j.1550-7408.2009.00405.x> PMID: 19527348; PMCID: PMC2853760.
35. Sommer MS, Gould SB, Lehmann P, Gruber A, Przyborski JM, Maier UG. Der1-mediated preprotein import into the periplastid compartment of chromalveolates? *Mol Biol Evol.* 2007; 24(4):918–28. <https://doi.org/10.1093/molbev/msm008> PMID: 17244602.
36. Spork S, Hiss JA, Mandel K, Sommer M, Kooij TW, Chu T, et al. An unusual ERAD-like complex is targeted to the apicoplast of *Plasmodium falciparum*. *Eukaryot Cell.* 2009; 8(8):1134–45. <https://doi.org/10.1128/EC.00083-09> PMID: 19502583; PMCID: PMC2725561.
37. Kalanon M, Tonkin CJ, McFadden GI. Characterization of two putative protein translocation components in the apicoplast of *Plasmodium falciparum*. *Eukaryot Cell.* 2009; 8(8):1146–54. <https://doi.org/10.1128/EC.00061-09> PMID: 19502580; PMCID: PMC2725556.
38. Agrawal S, van Dooren GG, Beatty WL, Striepen B. Genetic evidence that an endosymbiont-derived endoplasmic reticulum-associated protein degradation (ERAD) system functions in import of apicoplast proteins. *J Biol Chem.* 2009; 284(48):33683–91. <https://doi.org/10.1074/jbc.M109.044024> PMID: 19808683; PMCID: PMC2785210.
39. Stork S, Moog D, Przyborski JM, Wilhelmi I, Zauner S, Maier UG. Distribution of the SELMA translocon in secondary plastids of red algal origin and predicted uncoupling of ubiquitin-dependent translocation from degradation. *Eukaryot Cell.* 2012; 11(12):1472–81. <https://doi.org/10.1128/EC.00183-12> PMID: 23042132; PMCID: PMC3536273.
40. Agrawal S, Chung DW, Ponts N, van Dooren GG, Prudhomme J, Brooks CF, et al. An apicoplast localized ubiquitylation system is required for the import of nuclear-encoded plastid proteins. *PLoS Pathog.* 2013; 9(6):e1003426. <https://doi.org/10.1371/journal.ppat.1003426> PMID: 23785288; PMCID: PMC3681736.
41. Fellows JD, Cipriano MJ, Agrawal S, Striepen B. A plastid protein that evolved from ubiquitin and is required for apicoplast protein import in *Toxoplasma gondii*. *mBio.* 2017; 8(3):e00950–17. <https://doi.org/10.1128/mBio.00950-17> PMID: 28655825; PMCID: PMC5487736.
42. Tawk L, Chicanne G, Dubremetz JF, Richard V, Payraastre B, Vial HJ, et al. Phosphatidylinositol 3-phosphate, an essential lipid in *Plasmodium*, localizes to the food vacuole membrane and the apicoplast.

- Eukaryot Cell. 2010; 9(10):1519–30. <https://doi.org/10.1128/EC.00124-10> PMID: 20709789; PMCID: PMC2950420.
43. Kitamura K, Kishi-Itakura C, Tsuboi T, Sato S, Kita K, Ohta N, et al. Autophagy-related Atg8 localizes to the apicoplast of the human malaria parasite *Plasmodium falciparum*. *PLoS ONE*. 2012; 7(8):e42977. <https://doi.org/10.1371/journal.pone.0042977> PMID: 22900071; PMCID: PMC3416769.
  44. Kong-Hap MA, Mouammine A, Daher W, Berry L, Lebrun M, Dubremetz JF, et al. Regulation of ATG8 membrane association by ATG4 in the parasitic protist *Toxoplasma gondii*. *Autophagy*. 2013; 9(9):1334–48. <https://doi.org/10.4161/auto.25189> PMID: 23748741.
  45. Tomlins AM, Ben-Rached F, Williams RA, Proto WR, Coppens I, Ruch U, et al. *Plasmodium falciparum* ATG8 implicated in both autophagy and apicoplast formation. *Autophagy*. 2013; 9(10):1540–52. <https://doi.org/10.4161/auto.25832> PMID: 24025672.
  46. Cervantes S, Bunnik EM, Saraf A, Conner CM, Escalante A, Sardu ME, et al. The multifunctional autophagy pathway in the human malaria parasite, *Plasmodium falciparum*. *Autophagy*. 2014; 10(1):80–92. <https://doi.org/10.4161/auto.26743> PMID: 24275162; PMCID: PMC4028325.
  47. Dikic I, Elazar Z. Mechanism and medical implications of mammalian autophagy. *Nat Rev Mol Cell Biol*. 2018; 19(6):349–64. <https://doi.org/10.1038/s41580-018-0003-4> PMID: 29618831.
  48. Leveque MF, Berry L, Cipriano MJ, Nguyen HM, Striepen B, Besteiro S. Autophagy-related protein ATG8 has a noncanonical function for apicoplast inheritance in *Toxoplasma gondii*. *mBio*. 2015; 6(6):e01446–15. <https://doi.org/10.1128/mBio.01446-15> PMID: 26507233; PMCID: PMC4626856.
  49. Walczak M, Ganesan SM, Niles JC, Yeh E. ATG8 is essential specifically for an autophagy-independent function in apicoplast biogenesis in blood-stage malaria parasites. *mBio*. 2018; 9(1):e02021–17. <https://doi.org/10.1128/mBio.02021-17> PMID: 29295911; PMCID: PMC5750400.
  50. Mizushima N, Sahani MH. ATG8 localization in apicomplexan parasites: apicoplast and more? *Autophagy*. 2014; 10(9):1487–94. <https://doi.org/10.4161/auto.32183> PMID: 25102412; PMCID: PMC4206529.
  51. Schink KO, Tan KW, Stenmark H. Phosphoinositides in control of membrane dynamics. *Annu Rev Cell Dev Biol*. 2016; 32:143–71. <https://doi.org/10.1146/annurev-cellbio-111315-125349> PMID: 27576122.
  52. Daher W, Morlon-Guyot J, Sheiner L, Lentini G, Berry L, Tawk L, et al. Lipid kinases are essential for apicoplast homeostasis in *Toxoplasma gondii*. *Cell Microbiol*. 2015; 17(4):559–78. <https://doi.org/10.1111/cmi.12383> PMID: 25329540; PMCID: PMC4356647.
  53. Bansal P, Tripathi A, Thakur V, Mohammed A, Sharma P. Autophagy-related protein ATG18 regulates apicoplast biogenesis in apicomplexan parasites. *mBio*. 2017; 8(5):e01468–17. <https://doi.org/10.1128/mBio.01468-17> PMID: 29089429; PMCID: PMC5666157.
  54. Nguyen HM, Liu S, Daher W, Tan F, Besteiro S. Characterisation of two *Toxoplasma* PROPPINs homologous to Atg18/WIPI suggests they have evolved distinct specialised functions. *PLoS ONE*. 2018; 13(4):e0195921. <https://doi.org/10.1371/journal.pone.0195921> PMID: 29659619; PMCID: PMC5901921.
  55. Proikas-Cezanne T, Takacs Z, Donnes P, Kohlbacher O. WIPI proteins: essential PtdIns3P effectors at the nascent autophagosome. *J Cell Sci*. 2015; 128(2):207–17. <https://doi.org/10.1242/jcs.146258> PMID: 25568150.
  56. Chou TF, Brown SJ, Minond D, Nordin BE, Li K, Jones AC, et al. Reversible inhibitor of p97, DBE9, impairs both ubiquitin-dependent and autophagic protein clearance pathways. *Proc Natl Acad Sci U S A*. 2011; 108(12):4834–9. <https://doi.org/10.1073/pnas.1015312108> PMID: 21383145; PMCID: PMC3064330.
  57. Chou TF, Li K, Frankowski KJ, Schoenen FJ, Deshaies RJ. Structure-activity relationship study reveals ML240 and ML241 as potent and selective inhibitors of p97 ATPase. *ChemMedChem*. 2013; 8(2):297–312. <https://doi.org/10.1002/cmde.201200520> PMID: 23316025; PMCID: PMC3662613.
  58. Magnaghi P, D'Alessio R, Valsasina B, Avanzi N, Rizzi S, Asa D, et al. Covalent and allosteric inhibitors of the ATPase VCP/p97 induce cancer cell death. *Nat Chem Biol*. 2013; 9(9):548–56. <https://doi.org/10.1038/nchembio.1313> PMID: 23892893.
  59. Anderson DJ, Le Moigne R, Djakovic S, Kumar B, Rice J, Wong S, et al. Targeting the AAA ATPase p97 as an approach to treat cancer through disruption of protein homeostasis. *Cancer Cell*. 2015; 28(5):653–65. <https://doi.org/10.1016/j.ccell.2015.10.002> PMID: 26555175; PMCID: PMC4941640.
  60. Hyer ML, Milhollen MA, Ciavarrri J, Fleming P, Traore T, Sappal D, et al. A small-molecule inhibitor of the ubiquitin activating enzyme for cancer treatment. *Nat Med*. 2018; 24(2):186–93. <https://doi.org/10.1038/nm.4474> PMID: 29334375.
  61. Walker DM, Mahfooz N, Kemme KA, Patel VC, Spangler M, Drew ME. *Plasmodium falciparum* erythrocytic stage parasites require the putative autophagy protein PfAtg7 for normal growth. *PLoS ONE*. 2013; 8(6):e67047. <https://doi.org/10.1371/journal.pone.0067047> PMID: 23825614; PMCID: PMC3692556.



62. Tang Y, Meister TR, Walczak M, Pulkoski-Gross MJ, Hari SB, Sauer RT, et al. A mutagenesis screen for essential plastid biogenesis genes in human malaria parasites. *PLoS Biol.* 2019; 17(2):e3000136. <https://doi.org/10.1371/journal.pbio.3000136> PMID: 30726238.
63. Hain AU, Weltzer RR, Hammond H, Jayabalasingham B, Dinglasan RR, Graham DR, et al. Structural characterization and inhibition of the *Plasmodium* Atg8-Atg3 interaction. *J Struct Biol.* 2012; 180(3):551–62. <https://doi.org/10.1016/j.jsb.2012.09.001> PMID: 22982544; PMCID: PMC3496014.
64. Hain AU, Bartee D, Sanders NG, Miller AS, Sullivan DJ, Levitskaya J, et al. Identification of an Atg8-Atg3 protein-protein interaction inhibitor from the medicines for Malaria Venture Malaria Box active in blood and liver stage *Plasmodium falciparum* parasites. *J Med Chem.* 2014; 57(11):4521–31. <https://doi.org/10.1021/jm401675a> PMID: 24786226; PMCID: PMC4059259.
65. Hain AU, Miller AS, Levitskaya J, Bosch J. Virtual screening and experimental validation identify novel inhibitors of the *Plasmodium falciparum* Atg8-Atg3 protein-protein interaction. *ChemMedChem.* 2016; 11(8):900–10. <https://doi.org/10.1002/cmdc.201500515> PMID: 26748931.
